# Supplementary material for: Selection of isomerization pathways of multistep photoswitches by chalcogen bonding
Source: PubMed Central journal article supplement (PMC10628202; doi:10.1038/s41467-023-43013-8), 2023-11-06
Supplement: 41467_2023_43013_MOESM3_ESM.pdf [file 41467_2023_43013_MOESM3_ESM.pdf]

## Description of Additional Supplementary Files

**File name: Supplementary Data 1**

**Description:** Atomic coordinates of the optimized geometries for the studied systems.

**File name: Supplementary Data 2**

**Description:** The single-crystal data of *E-2*, *E-3*, *E-4*, *Z-4*, *Z-5*, and *Z-6* are summarized in Supplementary Data 2 and archived at the Cambridge Crystallographic Data Centre under deposition no. CCDC 2249588 (*E-4*), 2249589 (*Z-4*), 2249590 (*Z-5*), 2249591 (*Z-6*), 2260917 (*E-2*), and 2260918 (*E-3*).
